# Supplementary material for: From biomass-derived furans to aromatic compounds: design of Al–Nb-SBA-15 mesoporous structures and study of their acid properties on catalytic performance
Source: Royal Society of Chemistry journal article supplement (doi:10.1039/d4cy00033a), 2024-01-01

# SUPPORTING INFORMATION

**From biomass-derived furans to aromatic compounds: Design of Al-Nb-SBA-15 mesoporous structures and study of their acid properties on catalytic performance.**

**Elías, Verónica R.<sup>1\*</sup>, Ferrero, Gabriel O. <sup>1</sup>, Idriceanu, Madalina G. <sup>2</sup>, Eimer, Griselda A.<sup>1</sup>, Domine, Marcelo E.<sup>2\*</sup>**

**Catalysts characterization**

**Figure S1.** SAXS pattern of SBA-15 sample (taken of Elías et al. [34]) and XRD patterns at high angle of the synthesized samples.

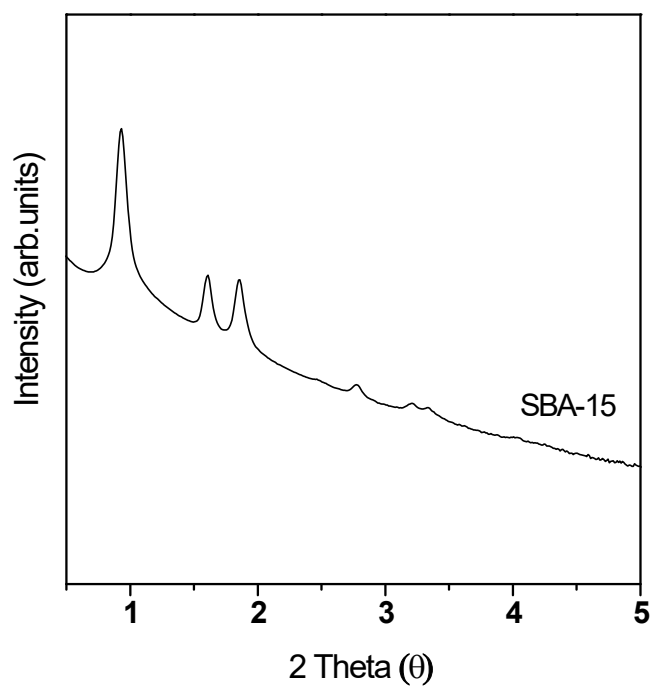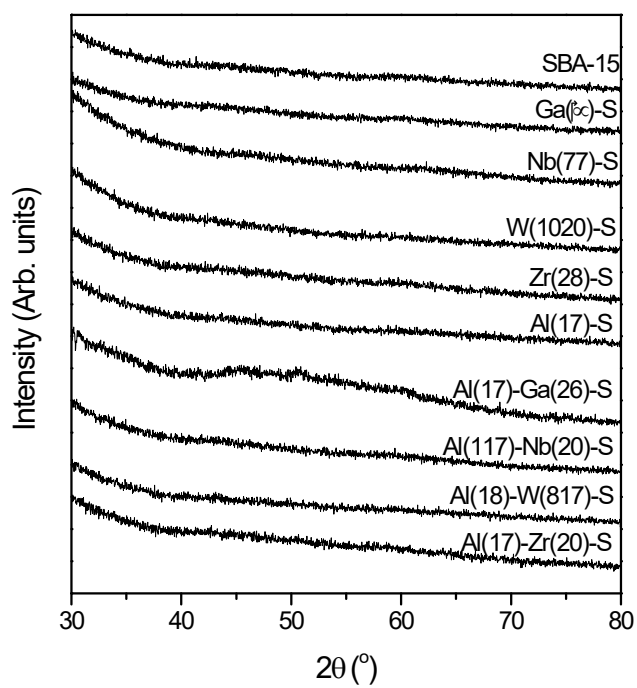

**Figure S2:** N<sub>2</sub> adsorption-desorption isotherms for synthesized catalysts.

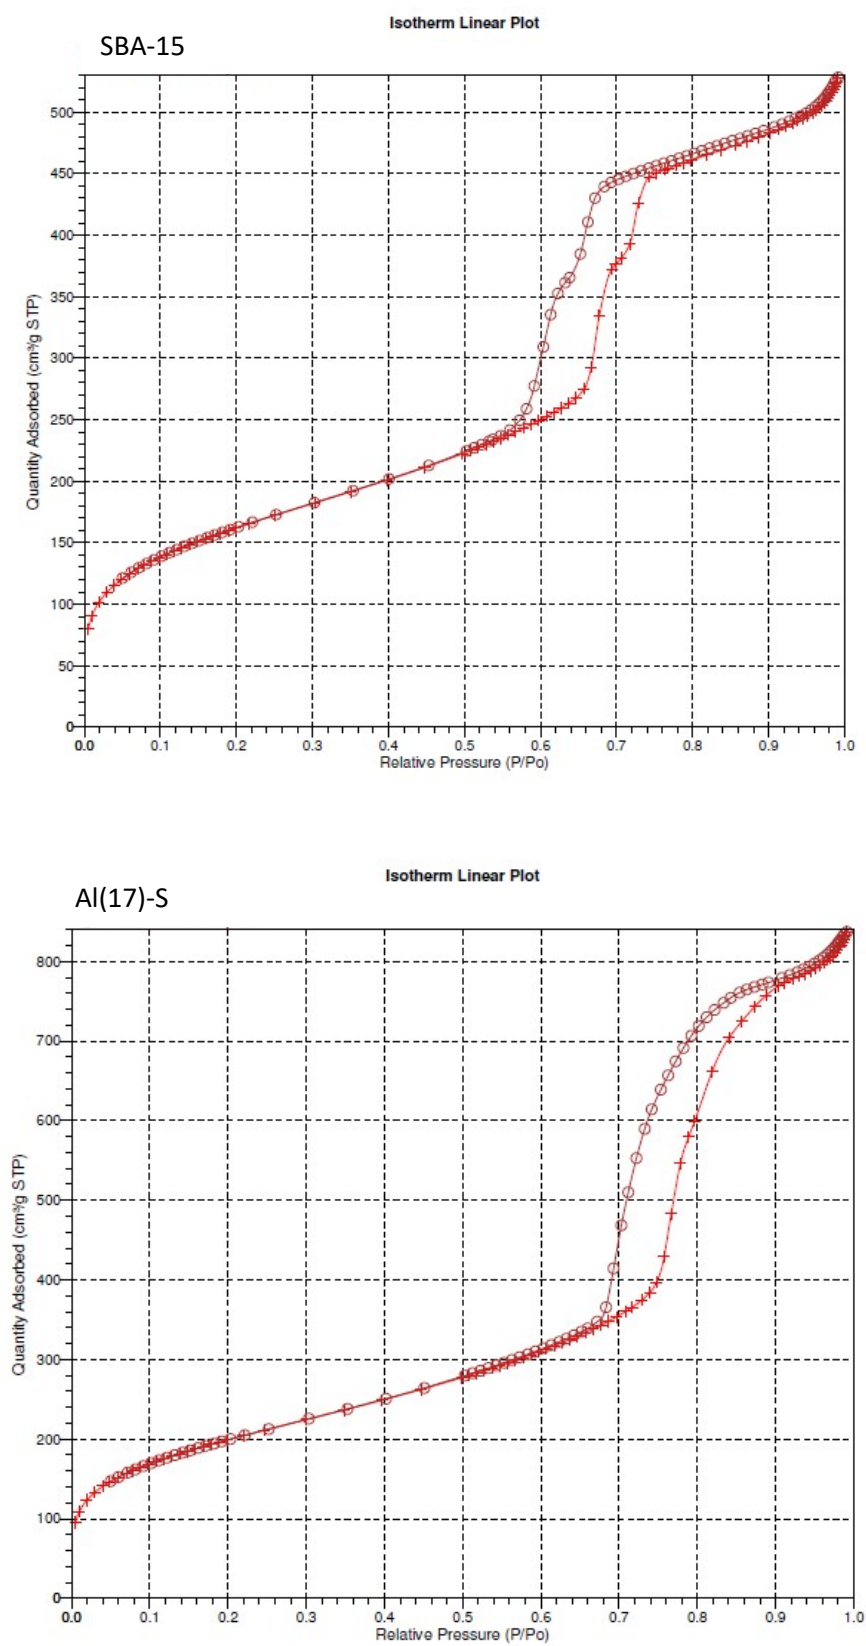

Isotherm Linear Plot

Al(117)-Nb(20)-S

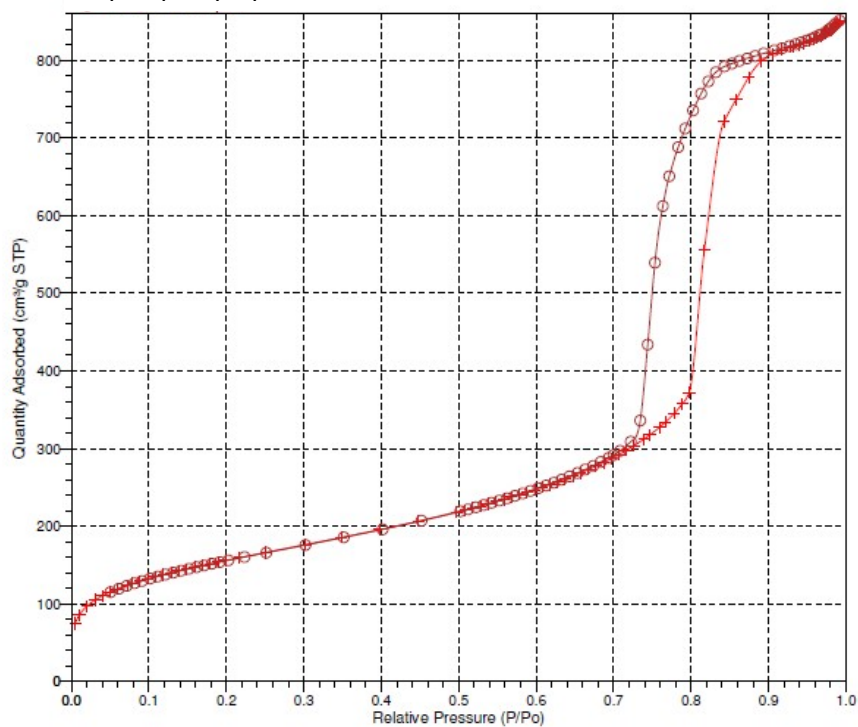

Isotherm Linear Plot

Al(17)-Zr(20)-S

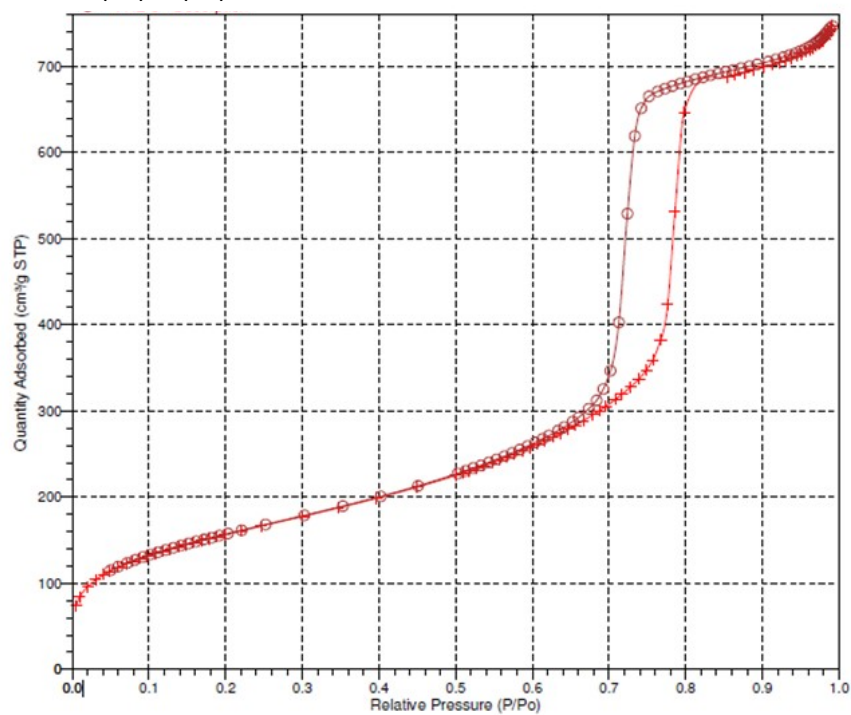

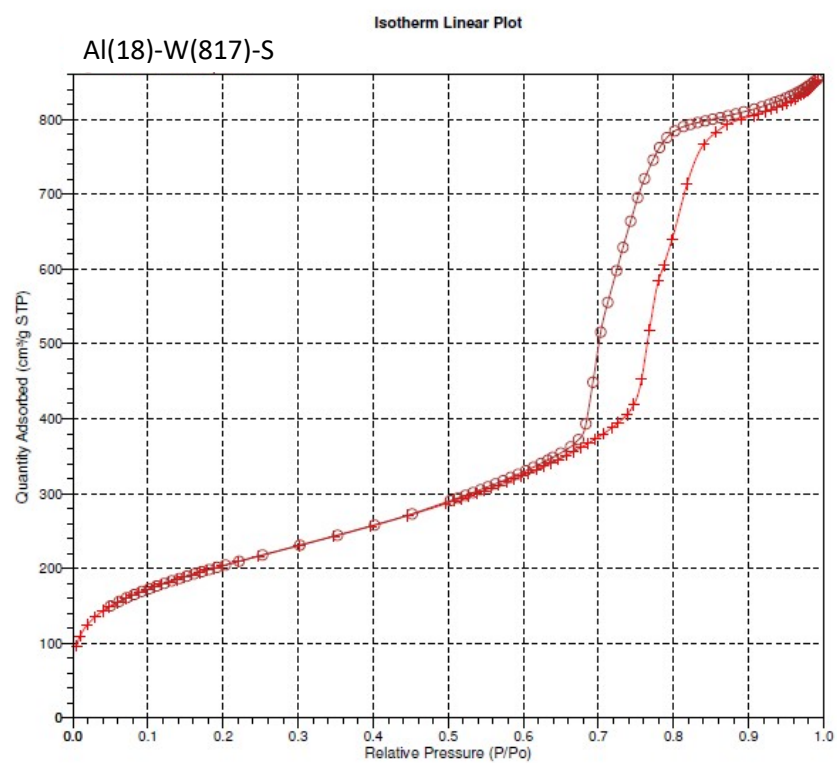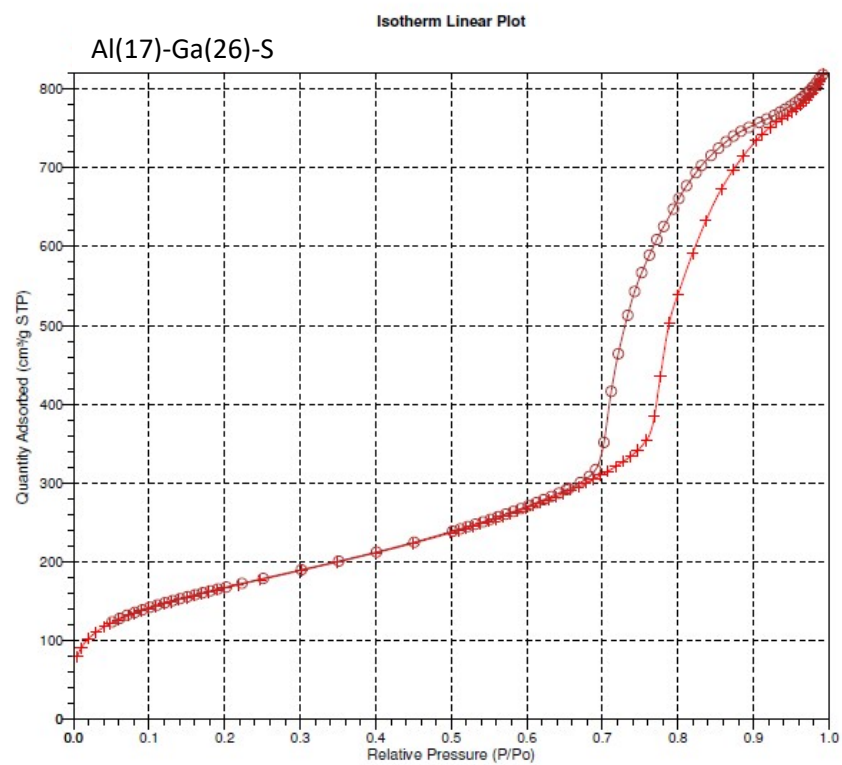

**Figure S3:** Profiles of  $\text{NH}_3$ -TPD measurements for synthesized catalysts, (A) mono- and bimetallic catalysts, (B) Al-Nb-SBA-15 catalysts.

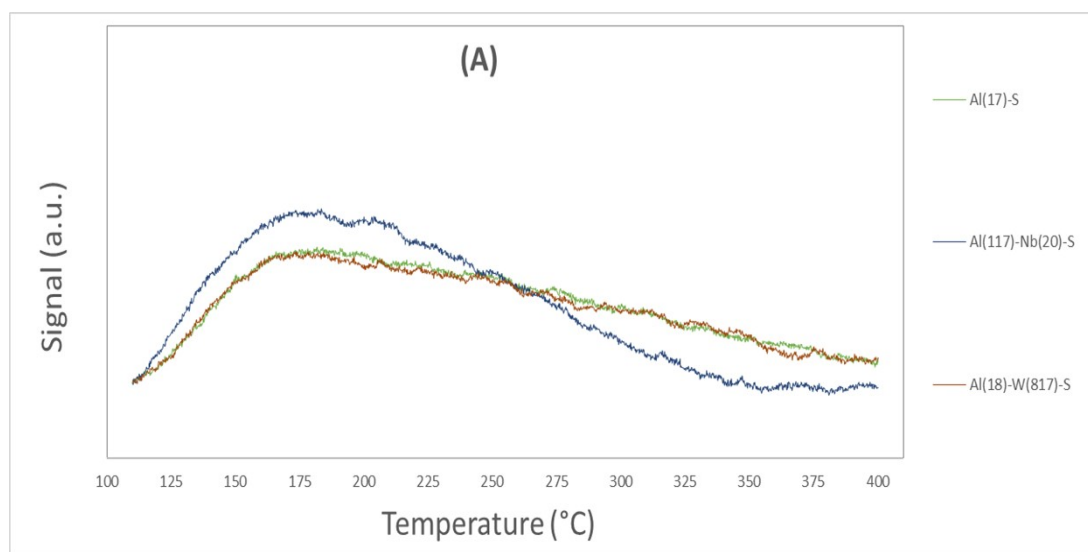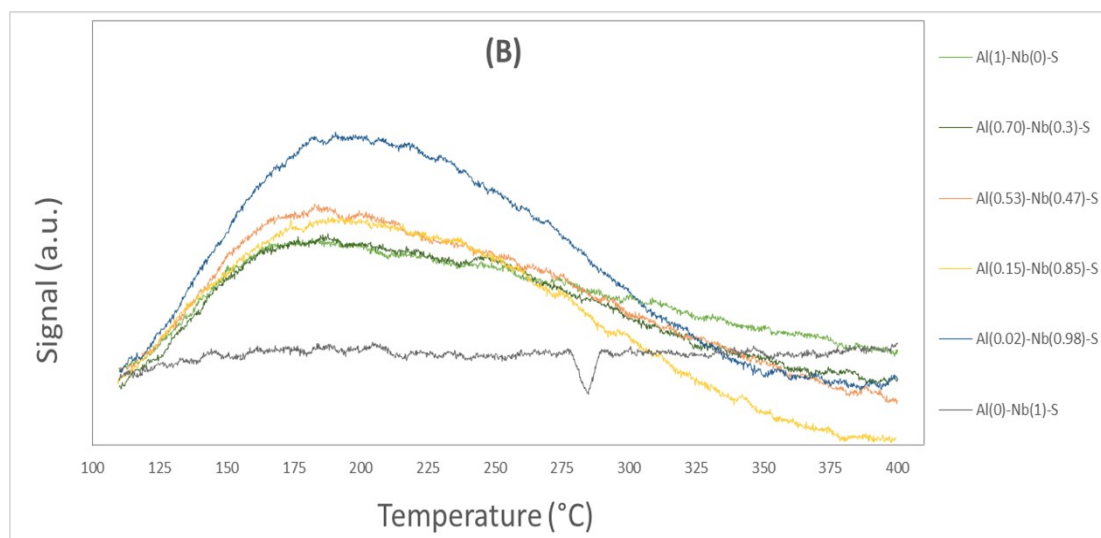

## Catalytic tests

**Table S1:** Catalytic results in the aromatization reaction over different SBA-15 modified catalysts.

| Catalyst         | Conversion              |                                                | Selectivity (in liquid fraction) |                          |                              | p-xy Yield (mol%) | Hexanedione Yield (mol%) |
|------------------|-------------------------|------------------------------------------------|----------------------------------|--------------------------|------------------------------|-------------------|--------------------------|
|                  | X <sub>DMF</sub> (mol%) | X <sub>C<sub>2</sub>H<sub>4</sub></sub> (mol%) | S <sub>p-xylene</sub>            | S <sub>hexanedione</sub> | S <sub>other aromatics</sub> |                   |                          |
| SBA-15           | 21.68                   | 13.85                                          | 37.72                            | 29.66                    | 10.96                        | 4.00              | 3.15                     |
| Al-S(17)         | 77.17                   | 39.27                                          | 52.74                            | 17.15                    | 12.29                        | 18.91             | 6.15                     |
| Zr(28)-S         | 70.92                   | 33.80                                          | 43.09                            | 16.09                    | 17.46                        | 14.53             | 5.43                     |
| W(1020)-S        | 67.89                   | 34.33                                          | 58.02                            | 19.17                    | 10.19                        | 19.39             | 4.67                     |
| Ga( $\infty$ )-S | 9.60                    | 20.38                                          | 36.62                            | 39.88                    | 2.65                         | 3.71              | 4.00                     |
| Nb(77)-S         | 37.99                   | 23.32                                          | 32.54                            | 46.56                    | 6.05                         | 7.99              | 11.44                    |
| Al(117)-Nb(20)-S | 57.98                   | 30.07                                          | 64.37                            | 6.10                     | 19.16                        | 25.48             | 7.58                     |
| Al(17)-Zr(20)-S  | 83.71                   | 28.41                                          | 47.30                            | 15.86                    | 16.49                        | 13.64             | 4.58                     |
| Al(18)-W(817)-S  | 77.99                   | 27.97                                          | 52.52                            | 13.80                    | 10.92                        | 19.27             | 5.06                     |
| Al(17)-Ga(26)-S  | 76.04                   | 28.74                                          | 52.75                            | 17.77                    | 11.24                        | 16.98             | 5.72                     |
| H-ZSM-5          | 51.37                   | 29.52                                          | 49.00                            | 23.50                    | 7.94                         | 20.47             | 9.61                     |

Reaction conditions: 250 °C, 0.15 g of catalyst, 0.3g of 2,5-DMF, 1,4-dioxane as solvent, at 1000 rpm during 5 h.

**Figure S4:** C balance from liquid, gas and solid phases obtained in the catalytic test of different metal-SBA-15 (A), and Al-Nb-SBA-15 (B) modified materials (CB-SP, CB-GP and CB-LP indicate the carbon present in solid, gas and liquid phases, respectively).

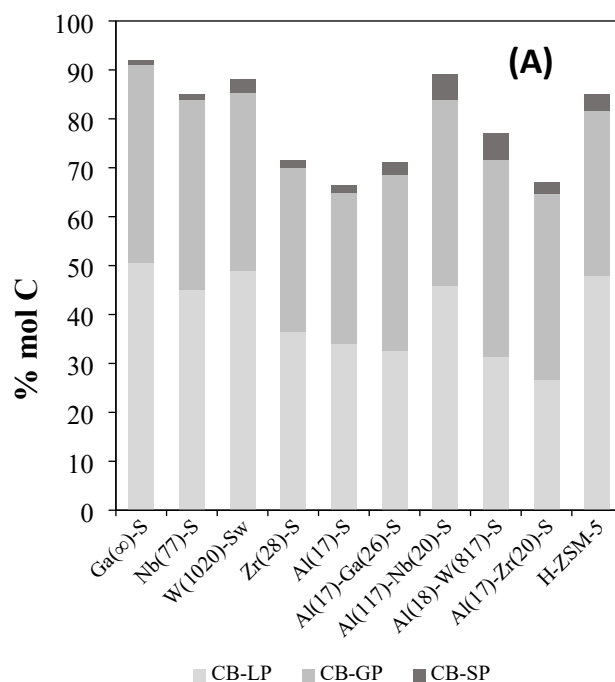

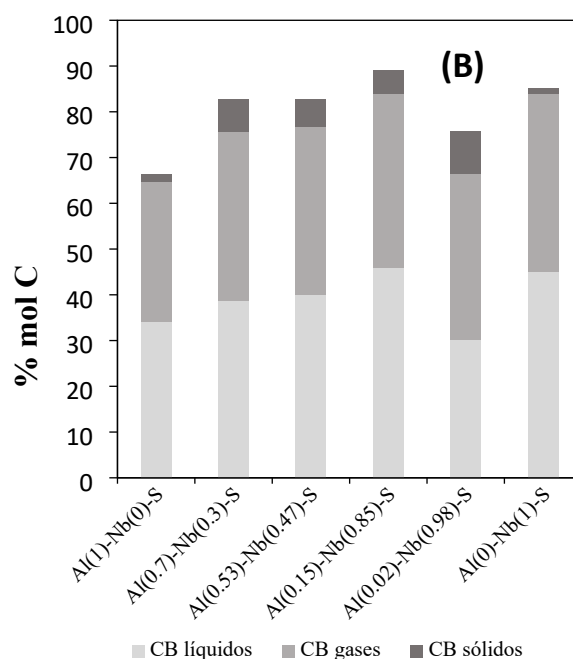

**Figure S5.** Catalyst performance by using 0.15 g of catalyst and 0.3g of 2,5-DMF (column A), respect to the half concentration of catalyst (column B) and to the half concentration of 2,5-DMF (column C), in terms of yield and selectivity to p-xy and hexanedione, 2,5-DMF conversion and Carbon % (deposited on used catalyst). Reaction conditions: 250 °C, 20 bar ethylene, magnetic stirring at 1000 rpm, 1,4-dioxane as solvent and 5 h of reaction time.

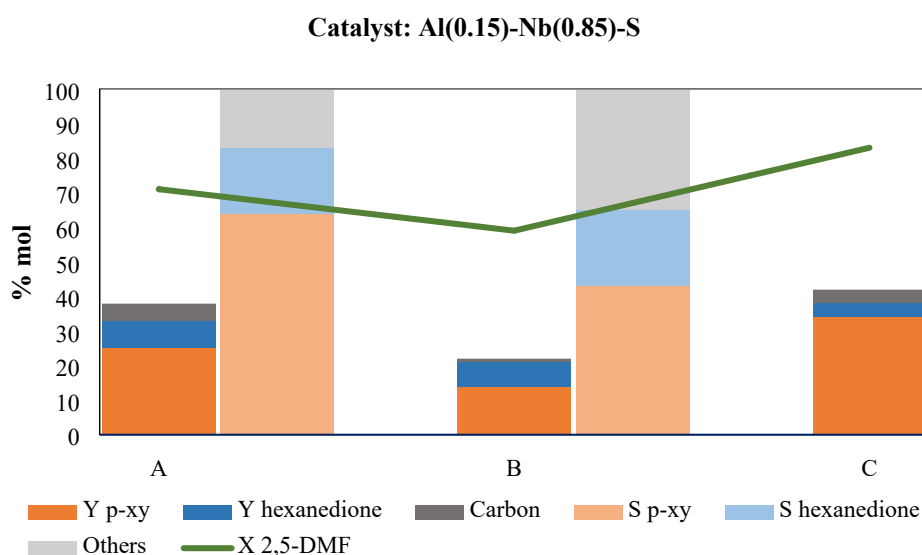

**Figure S6.** Catalyst performance with respect to reaction time in terms of yield and selectivity to p-xy and hexanedione, 2,5-DMF conversion and Carbon % (deposited on used catalyst). Reaction conditions: 250 °C, 30 bar of ethylene, 0.15 g of catalyst, 0.15g of 2,5-DMF, 1,4-dioxane as solvent and magnetic stirring at 1000 rpm.

Catalyst: Al(0.15)-Nb(0.85)-S

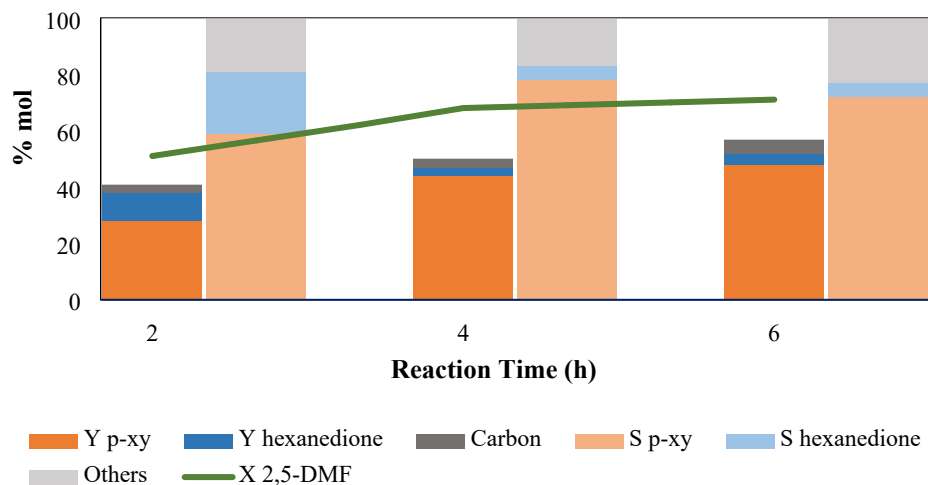

**Figure S7.** Catalytic tests at different stirring rates: (A) Conversion of 2,5-DMF (Mol.%) and selectivity to p-xylene (Mol.%); and (B) reaction rate calculated as mols converted per min. Reaction conditions: 250 °C, 30 bar of ethylene, 0.15 g of catalyst, 0.15g of 2,5-DMF, and 3 g of 1,4-dioxane as solvent during 6 h.

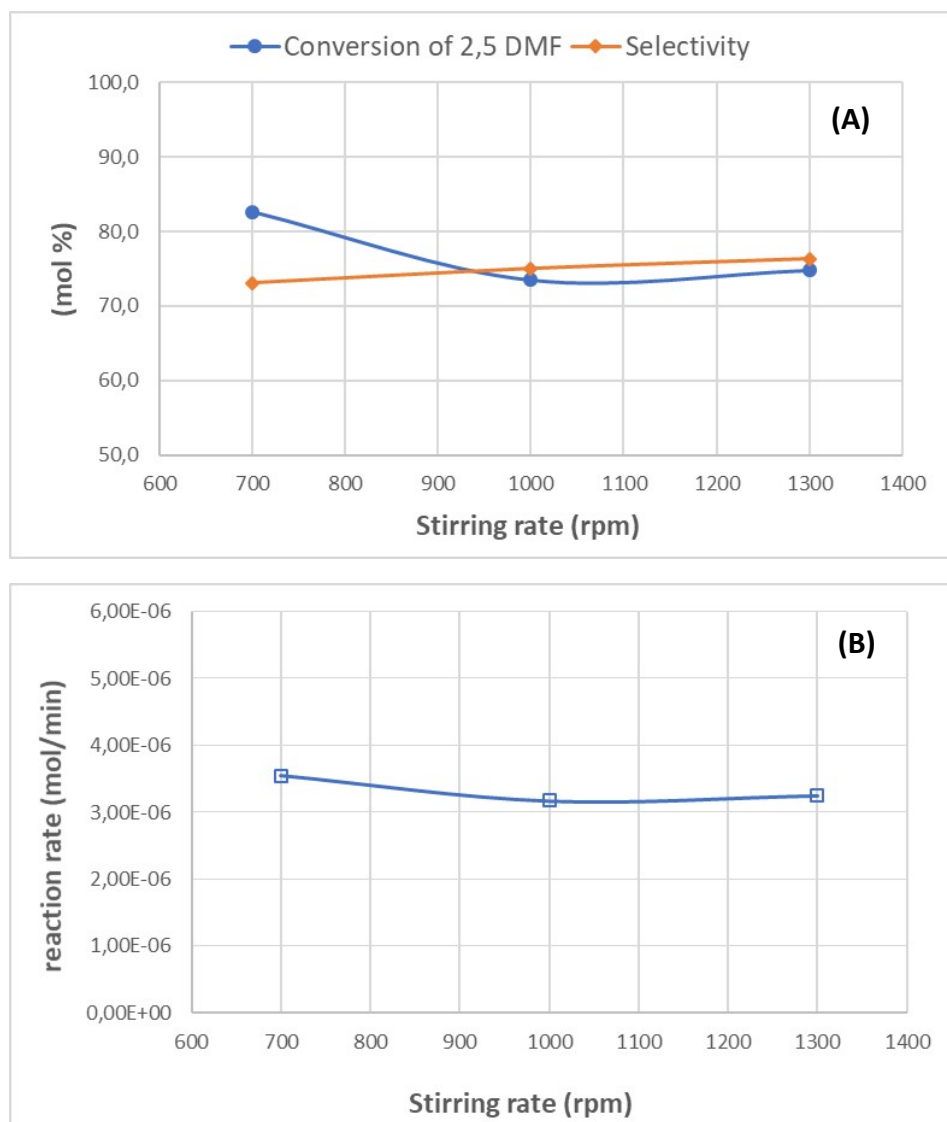

**Figure S8.** Catalytic tests with different particle diameters of catalyst: (A) Conversion of 2,5-DMF (Mol.%) and selectivity to p-xylene (Mol.%); and (B) reaction rate calculated as mols converted per min. Reaction conditions: 250 °C, 30 bar of ethylene, 0.15 g of catalyst, 0.15g of 2,5-DMF, and 3 g of 1,4-dioxane as solvent during 6 h.

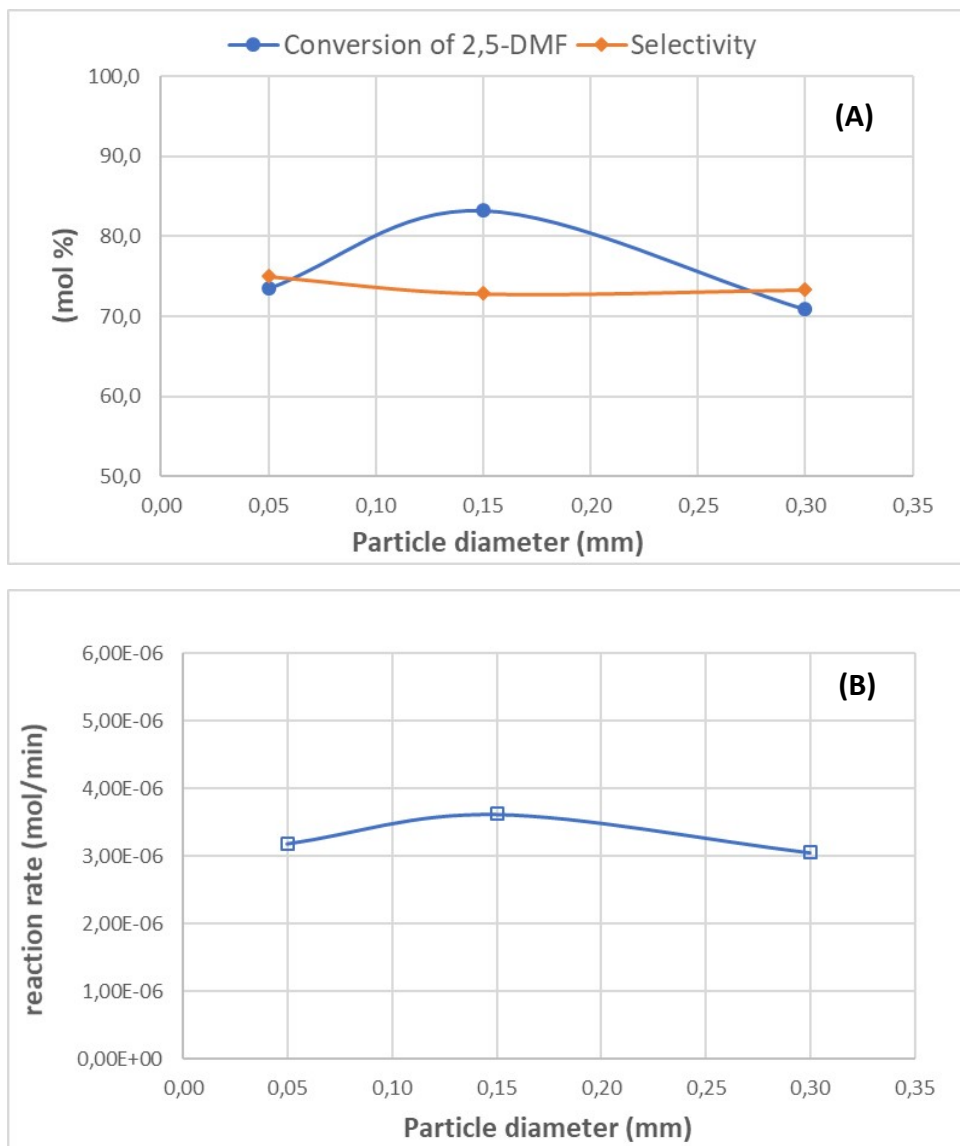

Supplement: d4cy00033a1.pdf [file d4cy00033a1.pdf]
